# Supplementary material for: Multivessel Coronary Artery Vasospasm-Induced Takotsubo Cardiomyopathy
Source: Case Rep Cardiol. 2022 Jan 17;2022:2192863. doi: 10.1155/2022/2192863 (PMC8786520; doi:10.1155/2022/2192863)
Supplement: Supplementary Materials — Video 1: Transthoracic echocardiogram, apical 4-chamber view, with contrast, showing ventricular dysfunction with apical dyskinesia, consistent with takotsubo cardiomyopathy. Video 2: Transthoracic echocardiogram, apical 4-chamber view, showing complete recovery of ventricular function about 4 weeks later. [file 2192863.f1.zip]

Archive with 2 entries (2 files):
- Video 1.mp4
- Video 2.mp4
